# Supplementary material for: Corticomotor Plasticity Predicts Clinical Efficacy of Combined Neuromodulation and Cognitive Training in Alzheimer’s Disease
Source: PubMed Central journal article supplement (PMC7360860; doi:10.3389/fnagi.2020.00200), 2020-07-08
Supplement: Presentation_1.pdf [file Presentation_1.pdf]

**Supplemental Table S1.** Plasticity measures in the AD sample from Boston (n=21) at baseline and after the end of the intervention (T5, T10, T20, T30).

|                       |      | T5 pre | T10 pre | T20 pre | T30 pre | T5 post | T10 post | T20 post | T30 post |
|-----------------------|------|--------|---------|---------|---------|---------|----------|----------|----------|
| <b>Real/<br/>real</b> | Mean | 0.94   | 0.97    | 1.19    | 1.06    | 1.08    | 1.19     | 1.17     | 1.10     |
|                       | SD   | 0.36   | 0.54    | 1.46    | 0.56    | 0.60    | 0.43     | 0.48     | 0.41     |
| <b>Sham/<br/>sham</b> | Mean | 0.86   | 0.99    | 1.12    | 1.00    | 1.38    | 1.28     | 1.50     | 1.16     |
|                       | SD   | 0.19   | 0.26    | 0.37    | 0.26    | 0.29    | 0.38     | 0.70     | 0.40     |
| <b>Real/<br/>sham</b> | Mean | 1.49   | 1.37    | 1.17    | 1.26    | 1.48    | 1.17     | 1.54     | 1.30     |
|                       | SD   | 0.41   | 0.56    | 0.52    | 0.50    | 0.94    | 0.68     | 0.89     | 0.82     |

**Supplemental Table S2.** ADAS-Cog results from each site (Boston and Rome) and combined results.

|               |      | Real/rea |       | Sham/sham |          | Real/sham |       |
|---------------|------|----------|-------|-----------|----------|-----------|-------|
|               |      | Mean     | SD    | Mean      | SD       | Mean      | SD    |
| <b>Boston</b> | Pre  | 22.60    | 10.90 | 22.81     | 12.48    | 25.20     | 10.46 |
|               | Post | 20.77    | 11.95 | 23.48     | 10.08    | 25.39     | 10.22 |
|               | FU   | 17.80    | 9.11  | -         | -        | 24.34     | 8.97  |
|               | N    | 10       | 10    | 6         | 6        | 5         | 5     |
| <b>Rome</b>   | Pre  | 23.67    | 8.98  | 26.00     | 9.90     | 25.00     | 10.05 |
|               | Post | 20.83    | 11.07 | 26.00     | 9.90     | 24.00     | 11.34 |
|               | FU   | 21.33    | 9.14  | 23.50     | 6.363961 | 22.40     | 13.90 |
|               | N    | 6        | 6     | 2         | 2        | 5         | 5     |
| <b>Total</b>  | Pre  | 23.00    | 2.48  | 23.61     | 3.99     | 25.10     | 3.06  |
|               | Post | 20.79    | 2.81  | 24.11     | 3.31     | 24.70     | 3.23  |
|               | FU   | 19.13    | 2.25  | 23.50     | 4.50     | 23.37     | 3.50  |
|               | N    | 16       | 16    | 8         | 8        | 10        | 10    |

### **Supplemental results**

Before adding the results from Rome to the results from Boston, we find very similar results. In Boston, the largest score change in ADAS-Cog within one month after the end of intervention was significantly different between groups (Boston:  $H[2]=11.626$ ,  $p=0.003$ ; Boston combined with Rome: ( $H[2]=10.16$ ,  $p=0.006$ )). Post-hoc tests also revealed a significantly higher improvement in the real/real group as compared to the sham/sham group (Boston:  $U = 58$ ,  $z = 3.04$ ,  $p = 0.001$ ,  $r = 0.76$ ; Boston combined with Rome: ( $U=115$ ,  $z=3.13$ ,  $p=0.001$ ,  $r=0.64$ )). However, while the real/real group was also significantly different from the real/sham group in Boston ( $U = 43$ ,  $z = 2.21$ ,  $p = 0.028$ ,  $r = 0.57$ ), this difference became non-significant after combining the results from Boston with Rome ( $U=110$ ,  $z=1.56$ ,  $p=0.121$ ,  $r=0.31$ ).
